# A Phos-Tag-Based Approach Reveals the Extent of Physiological Endoplasmic Reticulum Stress

Liu Yang<sup>1</sup>, Zhen Xue<sup>2,3</sup>, Yin He<sup>3,4</sup>, Shengyi Sun<sup>1,3</sup>, Hui Chen<sup>4</sup>, Ling Qi<sup>1,2,3,4\*</sup>

**1** Graduate Program in Biochemistry, Molecular and Cell Biology, Cornell University, Ithaca, New York, United States of America, **2** Graduate Program in Nutrition, Cornell University, Ithaca, New York, United States of America, **3** Graduate Program in Genetics and Development, Cornell University, Ithaca, New York, United States of America, **4** Division of Nutritional Sciences, Cornell University, Ithaca, New York, United States of America

## Abstract

Cellular response to endoplasmic reticulum (ER) stress or unfolded protein response (UPR) is a key defense mechanism associated with many human diseases. Despite its basic and clinical importance, the extent of ER stress inflicted by physiological and pathophysiological conditions remains difficult to quantitate, posing a huge obstacle that has hindered our further understanding of physiological UPR and its future therapeutic potential. Here we have optimized a Phos-tag-based system to detect the activation status of two proximal UPR sensors at the ER membrane. This method allowed for a quantitative assessment of the level of stress in the ER. Our data revealed quantitatively the extent of tissue-specific basal ER stress as well as ER stress caused by the accumulation of misfolded proteins and the fasting-refeeding cycle. Our study may pave the foundation for future studies on physiological UPR, aid in the diagnosis of ER-associated diseases and improve and facilitate therapeutic strategies targeting UPR *in vivo*.

**Citation:** Yang L, Xue Z, He Y, Sun S, Chen H, et al. (2010) A Phos-Tag-Based Approach Reveals the Extent of Physiological Endoplasmic Reticulum Stress. PLoS ONE 5(7): e11621. doi:10.1371/journal.pone.0011621

**Editor:** Neeraj Vij, Johns Hopkins School of Medicine, United States of America

**Received:** May 16, 2010; **Accepted:** June 21, 2010; **Published:** July 16, 2010

**Copyright:** © 2010 Yang et al. This is an open-access article distributed under the terms of the Creative Commons Attribution License, which permits unrestricted use, distribution, and reproduction in any medium, provided the original author and source are credited.

**Funding:** L.Y. was supported in part by the Stip Olin Fellowship (to L.Y.) and Y.H. was supported in part by the NIH Predoctoral Training Grant in Genetics and Development (5 T32 GM007617). L.Q. is the recipient of the 2008 Rosalinde and Arthur Foundation/AFAR New Investigator Award in Alzheimer's Diseases and the ADA Junior Faculty Award. This study was supported in part by American Federation for Aging Research (RAG08061), American Diabetes Association (7-08-JF-47) and NIH R01DK082582 (to L.Q.). The funders had no role in study design, data collection and analysis, decision to publish, or preparation of the manuscript.

**Competing Interests:** The authors have declared that no competing interests exist.

\* E-mail: lq35@cornell.edu

These authors contributed equally to this work.

## Introduction

ER homeostasis is tightly monitored by ER-to-nucleus signaling cascades termed UPR [1]. Recent studies have linked ER stress and UPR activation to many human diseases including heart complications, neurodegenerative disorders, and metabolic syndrome [1,2]. Indeed, chemical chaperones and antioxidants aiming to reduce ER stress and UPR activation have been shown to be effective in mouse models of obesity and type-1 diabetes [3–5]. Despite recent advances, our understanding of UPR activation under physiological conditions is still at its infancy, largely due to the lack of sensitive experimental systems that can detect mild UPR sensor activation.

The underlying mechanisms of UPR signaling and activation induced by chemical drugs such as thapsigargin (Tg) are becoming increasingly well-characterized [1]. Upon ER stress, two key ER-resident transmembrane sensors, inositol-requiring enzyme 1 (IRE1 $\alpha$ ) and PKR-like ER-kinase (PERK) undergo dimerization or oligomerization and trans-autophosphorylation via their C-terminal kinase domains, leading to their activation [1,2]. Phosphorylation of IRE1 $\alpha$  and PERK has been challenging, if not impossible, to detect under physiological conditions. The mobility-shift of IRE1 $\alpha$  shown in many studies is very subtle and, as demonstrated in this study, may be inaccurate and misleading. In addition, commercially-available phospho-specific antibodies (e.g. P-Ser724A IRE1 $\alpha$  and P-Thr980 PERK) do not reflect the overall phosphorylation status of the proteins. Finally, use of these

antibodies, if successful, raises the question as to whether Ser724 of IRE1 $\alpha$  or Thr980 of PERK is indeed phosphorylated under various physiological and disease conditions.

Alternatively, many studies have used downstream effectors such as X-box binding protein 1 (XBP1) mRNA splicing, phosphorylation of eukaryotic translation initiation factor 2 $\alpha$  (eIF2 $\alpha$ ), C/EBP homologous protein (CHOP) and various genes involved in protein folding and ER-associated degradation (ERAD) as surrogate markers for UPR activation. This method, albeit convenient, may be confounded by the possibility of integrating signals not directly related to stress in the ER. For example, the PERK pathway of the UPR is part of the integrated stress response that consists of three other eIF2 $\alpha$  kinases [1]. Activation of any of these kinases leads to eIF2 $\alpha$  phosphorylation and induction of ATF4 and CHOP [1]. A recent study also showed that ATF4 and CHOP can be regulated translationally in a PERK-independent manner via the TLR signaling pathways [6]. Furthermore, UPR target genes such as CHOP and ER chaperones can be induced by other signals, such as insulin and cytokines/growth factors [7,8]. Thus, downstream UPR targets alone are not best suited for accurate assessment and evaluation of UPR status, especially under physiological and disease settings.

Our previous study utilized the Phos-tag-based system [9] to detect IRE1 $\alpha$  phosphorylation mainly in Tg-treated culture cells [10]. Here we have further modified the system to maximize the resolution of IRE1 $\alpha$  phosphorylation and extended the system to detect PERK phosphorylation. Strikingly, our system allows for

increased sensitivity in detecting UPR activation and more importantly, accurate quantitation of ER stress. This powerful tool allows us to quantitatively measure the extent of UPR or ER stress induced by various physiological conditions, including (a) the accumulation of misfolded proteins in HEK293T cells, (b) the basal feeding conditions in various adult tissues and (c) the fasting-feeding cycle in the pancreas. Our data reveal that many tissues and cell types constitutively display mild ER stress and more intriguingly, various acute physiological challenges increase ER stress by 2–3 fold over basal levels.

## Results

### Visualization of sensor phosphorylation and quantitation of ER stress

We optimized the separation of phosphorylated IRE1 $\alpha$  and PERK proteins in a Phos-tag-based Western blot (see Methods section and Figure S1), which was reversed by phosphatase treatment (Figure 1A). Strikingly, IRE1 $\alpha$  and PERK hyperphosphorylation patterns were distinct (Figure 1A), reflecting various levels of phosphorylation upon activation. Dramatically, p-IRE1 $\alpha$  exhibited one discrete slow-migrating band in the Phos-tag gels, a feature that allows for quantitation of the percent of p-IRE1 $\alpha$  (see below). Upon treatment with Tg, the percent of phosphorylated IRE1 $\alpha$  increased from 30 min post-treatment, peaked around 4 h and slightly decreased at 8–17 h, with nearly 30, 100 and 80% of IRE1 $\alpha$  undergoing phosphorylation, respectively (Figure 1B–C). Similarly, PERK hyperphosphorylation increased at 30 min, peaked at 4 h and decreased after 8–17 h. In both cases, the dynamic patterns of IRE1 $\alpha$  and PERK phosphorylation were either not discernible or less impressive in regular gels or using the phospho-specific antibody (Figure 1B and D).

The temporal dynamic patterns of IRE1 $\alpha$  and PERK phosphorylation as shown above indicate that hyperphosphorylation of UPR sensors correlates with the amount of stress in the ER. Further supporting this notion, hyperphosphorylation of IRE1 $\alpha$  and PERK increased with Tg concentrations, peaking and subsequently plateauing at 38 nM Tg upon 4 h treatment (Figure 1E). Demonstrating the sensitivity and quantitative nature of our method, ~15% of IRE1 $\alpha$  protein were phosphorylated upon 4 nM Tg treatment and increased to ~50% under 9 nM Tg (Figure 1E–F). In contrast, IRE1 $\alpha$  phosphorylation was not visible using a regular gel system and phosphorylation of PERK was also much less impressive (Figure 1E). Thus, our method achieves both accuracy and sensitivity in detecting ER stress and UPR activation. We then went on to characterize the extent of ER stress under three physiological conditions.

### Accumulation of misfolded proteins induces mild ER stress

Although ER stress was initially characterized as induced by accumulation of unfolded proteins [11–13], it remains impossible to quantitate the levels of stress inflicted by accumulation of misfolded proteins in the ER. To this end, we ectopically expressed the terminally-misfolded  $\alpha$ 1-antitrypsin (AT) genetic variant-null Hong Kong (NHK) (Figure 2A), a frequently mutated allele in human  $\alpha$ 1 AT deficiency [14] or the dominant-negative mutant of p97 (p97-QQ) (Figure 2C), a member of the AAA-ATPase protein family involved in ERAD [15]. In both cases, IRE1 $\alpha$  and PERK were phosphorylated when compared to cells overexpressing control or wildtype proteins (Figure 2A and C), indicating the specificity of sensor activation in response to misfolded proteins. Interestingly, IRE1 $\alpha$  phosphorylation nearly tripled in both cases reaching 20–30% (Figure 2B–D). Similar observations were obtained in Sell1-deficient MEFs (not shown), in which ERAD is defective [16]. Thus, our data

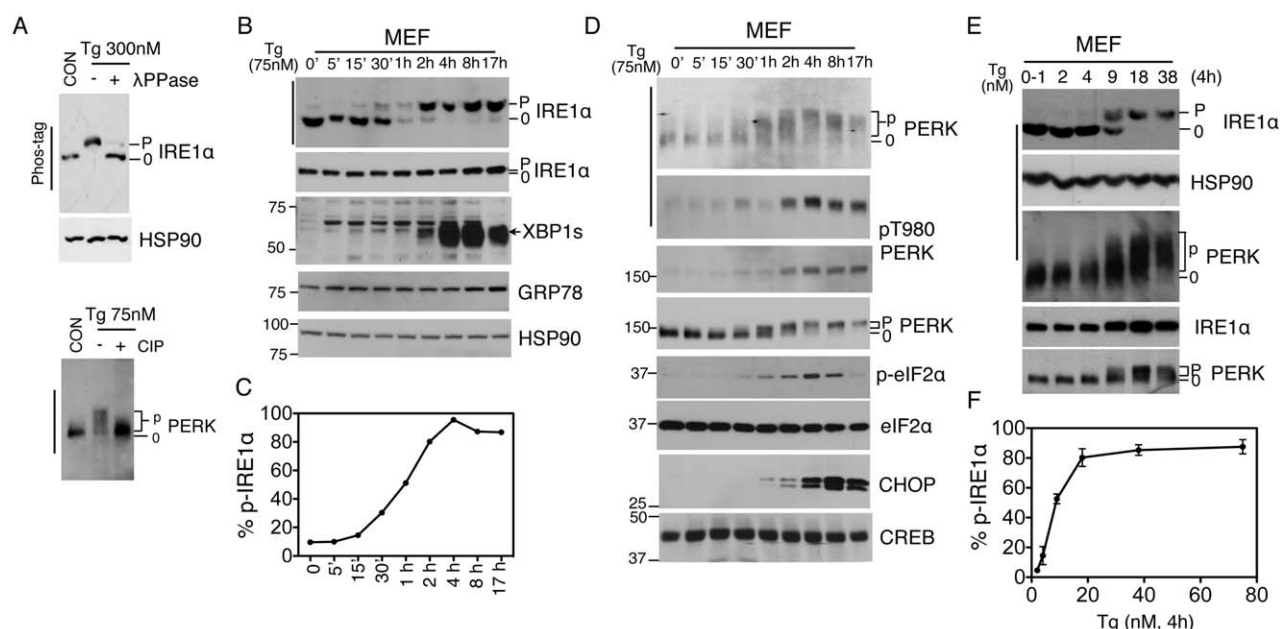

**Figure 1. Visualization and quantitation of ER stress under pharmacological stress.** (A) Immunoblots of IRE1 $\alpha$  (upper) and PERK (lower) proteins in Tg-treated MEFs treated with or without  $\lambda$ PPase or CIP. (B and D) Immunoblots of IRE1 $\alpha$  (B) and PERK (D) using the Phos-tag vs. regular gels. MEFs were treated with 75 nM Tg at indicated period of time. (C) Quantitation of percent of phosphorylated IRE1 $\alpha$  in total IRE1 $\alpha$  protein in Phos-tag gels shown in B. (E) Immunoblots of IRE1 $\alpha$  and PERK in wildtype MEFs treated with Tg at indicated concentrations for 4 h. (F) Quantitation of percent of phosphorylated IRE1 $\alpha$  in total IRE1 $\alpha$  protein in Phos-tag gels in E. HSP90 and CREB, loading controls. Phos-tag gels are indicated with a bar at the left-hand side. "0" refers to the non- or hypophosphorylated forms of the protein whereas "p" refers to the phosphorylated forms of the protein. doi:10.1371/journal.pone.0011621.g001

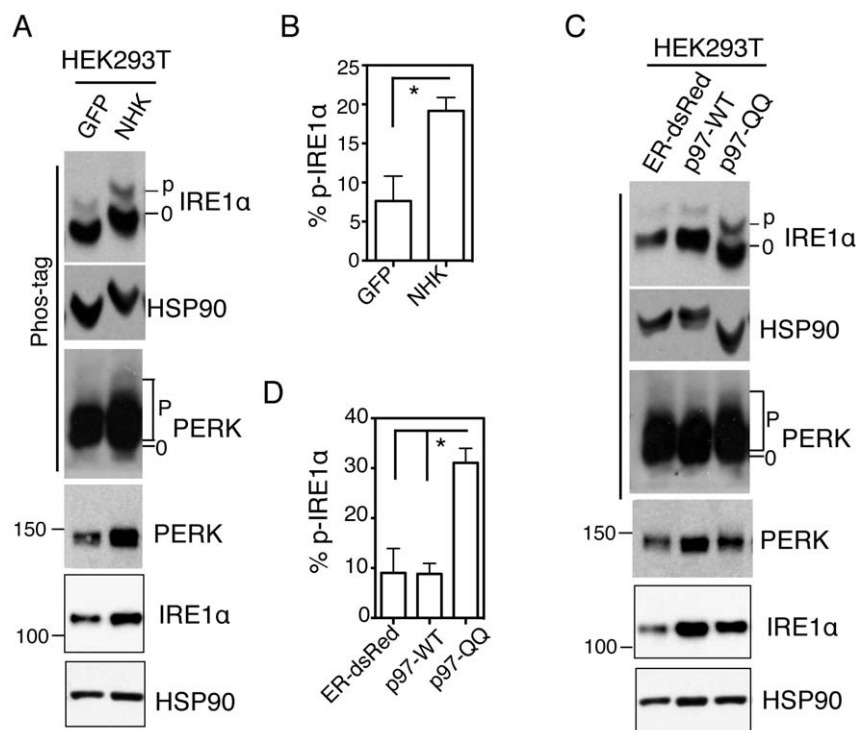

**Figure 2. Accumulation of misfolded proteins induces mild ER stress.** (A and C) Immunoblots of IRE1 $\alpha$  and PERK in HEK293T cells transfected with the indicated plasmids for 24 h. NHK, the unfolded form of  $\alpha$ 1-antitrypsin; p97-QQ, dominant negative form of p97-WT. ER-dsRed and GFP, negative control plasmids. HSP90, a position and loading control. (B and D) Quantitation of percent of phosphorylated IRE1 $\alpha$  in total IRE1 $\alpha$  protein in Phos-tag gels shown in A, C. Values are mean  $\pm$  SEM \*,  $P < 0.05$  using unpaired two-tailed Student's *t*-test. Representative data from at least three independent experiments shown.

doi:10.1371/journal.pone.0011621.g002

revealed quantitatively the extent of ER stress induced by accumulation of misfolded proteins in the ER, a finding that was impossible using regular systems under similar running conditions (Figure 2A and C).

### Many tissues exhibit basal ER stress under feeding conditions

We then analyzed the levels of basal ER stress in various tissues from adult mice under feeding conditions. Intriguingly, many tissues exhibited slower electrophoretic mobility of IRE1 $\alpha$  and PERK proteins (Figure 3A and S2A). The mobility shift of IRE1 $\alpha$  and PERK was specific for phosphorylation as it was reversed by phosphatase treatment (Figure 3B and S2B); importantly, this was caused by signals from the ER as it was attenuated in the presence of a protein translation inhibitor, cycloheximide (CHX) (Figure 3C). Quantitatively, phosphorylated IRE1 $\alpha$  accounted for over 40% of total IRE1 $\alpha$  protein in the pancreas and  $\sim$ 10% in most of the other tissues (Figure 3D). Our data is in line with an early finding in which the XBP1-GFP reporter mice exhibited basal UPR primarily in the pancreas [17]. Pointing to the complexity of tissue-specific UPR, IRE1 $\alpha$  exhibited multiple slower migrating bands and PERK was beyond the detection limit in skeletal muscle (Figure 3A and S2A). The nature of these slower migrating bands in the IRE1 $\alpha$  blot was not due to phosphorylation as they were resistant to phosphatase treatment (Figure S2C).

### Refeeding induces mild ER stress in the pancreas

We then conducted an in-depth analysis of UPR activation during the fasting-refeeding process in the pancreas (20 hr fasting followed by 2 hr feeding). Indeed, refeeding significantly increased phosphor-

ylation of both IRE1 $\alpha$  and PERK (percent of p-IRE1 $\alpha$  under fasting vs. refeeding:  $8.7 \pm 4.3\%$  vs.  $29.5 \pm 5.4\%$ ;  $P < 0.05$ ) (Figure 4A–B). This effect was independent of the region of the pancreas sampled (Figure S2D). Supporting the importance of our method in analyzing mild physiological UPR, similar running conditions in regular gels resulted in a much less impressive mobility-shift for PERK (Figure 4A). This mild PERK phosphorylation was undetectable using the phospho-PERK antibody (Figure 4A). In addition, although IRE1 $\alpha$  did exhibit a slightly slower mobility shift upon refeeding in regular gels after prolonged gel running conditions, this shift did not reflect the overall phosphorylation status of IRE1 $\alpha$  as revealed by the Phos-tag gel (Figure 4A). Furthermore, phosphorylation of eIF2 $\alpha$ , an immediate downstream effector of PERK, did not change (Figure 4A). Finally, while some UPR targets such as CHOP, ERDJ4 and P58IPK were induced upon refeeding (Figure 4C), both the mRNA and protein levels of Grp78, an ER chaperone, were not altered (Figure 4A and C). Thus, our data demonstrated that the fasting-refeeding cycle acutely stimulates mild UPR activation in the pancreas.

### Discussion

In summary, we have optimized a sensitive and simple Phos-tag-based system to quantitatively assess ER stress and UPR activation with the following major advantages: First, dynamic ranges of PERK and IRE1 $\alpha$  phosphorylation can be more sensitively visualized compared to regular SDS-PAGE gels; this is particularly important for physiological UPR where ER stress can be so mild that traditional methods may no longer be accurate or reliable. Second, the major breakthrough of our method lies in the unique pattern of IRE1 $\alpha$  phosphorylation in the Phos-tag gel,

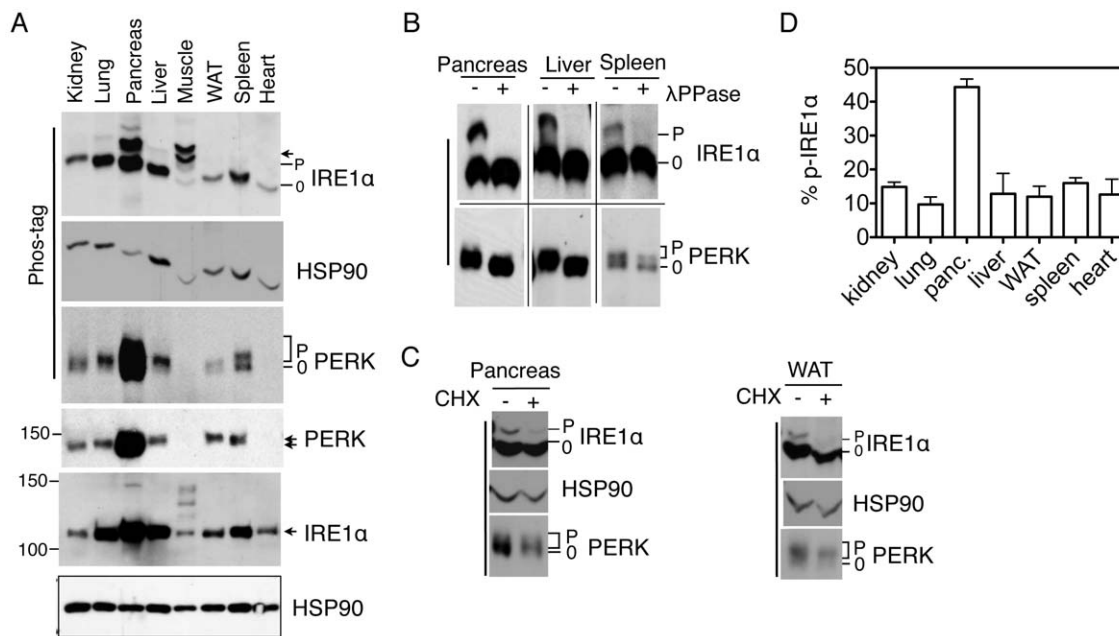

**Figure 3. Many tissues exhibit basal ER stress under feeding conditions.** (A) Immunoblots of IRE1 $\alpha$  and PERK in various tissues of wildtype mice. WAT, white adipose tissues; Panc, pancreas; Muscle, gastrocnemius. HSP90, a position and loading control. (B–C) Immunoblots of IRE1 $\alpha$  and PERK in tissue lysates treated with  $\lambda$ PPase (B) or in pancreatic and WAT lysates prepared from mice injected with CHX (C). (D) Quantitation of percent of phosphorylated IRE1 $\alpha$  in total IRE1 $\alpha$  protein in various tissues shown in A. Values are mean  $\pm$  SEM. Representatives of at least two independent experiments shown.

doi:10.1371/journal.pone.0011621.g003

which allows for a quantitative assessment of ER stress. To our knowledge, this is the first demonstration of quantitation of ER stress under physiological or pathological settings (e.g. the fasting-refeeding cycle or the accumulation of misfolded proteins). Finally, in comparison to using commercially-available phospho-specific antibodies (e.g. P-Ser724A IRE1 $\alpha$  and P-Thr980 PERK), our method not only provides a complete view of the overall phosphorylation status of IRE1 $\alpha$  and PERK proteins, but also circumvents the issue of whether these specific residues are indeed phosphorylated under certain physiological conditions.

Our data reveal that many tissues and cell types display constitutive basal UPR activity, presumably to counter misfolded proteins passing through the ER. This observation is in line with an early report demonstrating that under physiological conditions removal of these misfolded proteins in yeast requires coordinated action of UPR and ERAD [18]. Taking it one step further, our data show that a fraction of mammalian IRE1 $\alpha$  and PERK is constitutively active in many tissues, with  $\sim$ 10% IRE1 $\alpha$  being phosphorylated and activated. This low level of IRE1 $\alpha$  activation and ER stress in many tissues may provide a plausible explanation for the inability of an earlier study to detect basal UPR in the XBP1s-GFP reporter mice [17]. We believe that this basal UPR activity, especially the IRE1 $\alpha$ -XBP1 branch, is critical in maintaining ER homeostasis and providing quality control as supported by the embryonic lethality of IRE1 $\alpha$  and XBP1-deficient mice [1,19–22]. It is noteworthy that in skeletal muscles, IRE1 $\alpha$  exhibited multiple non-phosphorylated bands while PERK protein is beyond the detection limit. As the IRE1 $\alpha$ -XBP1 pathway is active in adult skeletal muscles [17], the role of UPR in myocytes is an interesting question as it may offer new insights into physiological UPR.

As exocrine pancreatic acinar cells account for over 80% of the pancreatic mass, pancreatic ER stress observed under the fasting-refeeding cycle likely reflects the acute elevation of protein synthesis

in acinar cells in response to food intake [23]. Indeed, mice with XBP1 or PERK deficiency exhibit defective development of exocrine pancreas [24–26], suggesting an indispensable role for UPR in countering the fluctuating stress associated with food intake. While UPR is mildly active under fasting presumably to attenuate protein synthesis as previously suggested [26], our data showed a 3-fold increase of IRE1 $\alpha$  phosphorylation, i.e. UPR, to enhance ER homeostasis in preparation for an upcoming wave of protein synthesis. Our results are in line with earlier observations demonstrating that ER in pancreatic acinar cells becomes dilated within 2–4 h refeeding [27,28]. Nonetheless, it is quite surprising that ER stress in pancreatic cells fluctuates with the fasting-refeeding cycle because acute mild UPR would expectedly reset proteostasis upon each fasting-refeeding cycle, leading to the expansion of the proteostasis network and adaptation [29]. Hence, we postulate that the proteostasis network in acinar cells is very flexible in order to respond to many variables in the feeding process. The same is likely to be true for pancreatic islet cells.

There are several potential applications for our method in both basic and clinical research. First, our method may help elucidate the activation mechanisms for IRE1 $\alpha$  and PERK. The effect of critical residues or inter-/intra-molecular interactions on sensor activation as well as branch-specific activation of non-canonical UPR pathways can now be accurately measured and quantitated. Second, our method may aid in the diagnosis of UPR-associated diseases by providing a more sensitive tool for detecting ER stress. The knowledge of the extent of ER stress in a given tissue of a patient may help assess disease progression. Finally, our method may assist in drug development and design. The efficacy of drugs such as chemical chaperones or antioxidants on ER stress can be quantitatively measured based on sensor activation, circumventing the complications associated with crosstalk among various pathways.

As ER stress is being implicated in an increasing number of physiological processes as well as human diseases such as cancer,

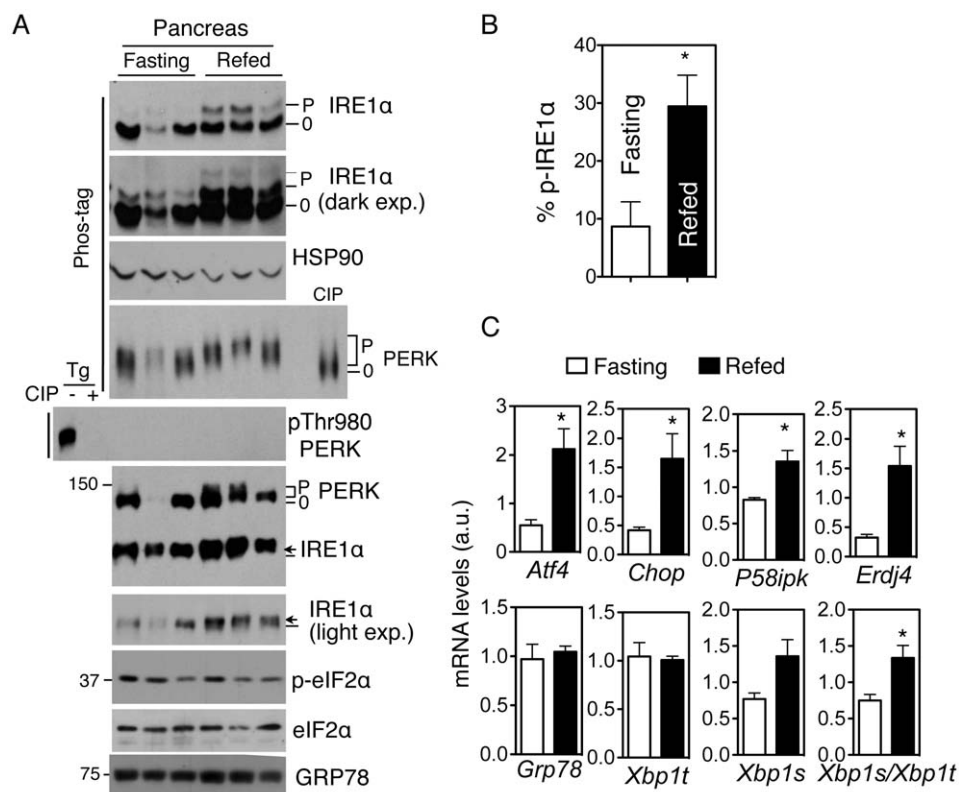

**Figure 4. Fasting-refeeding induces mild ER stress in pancreas.** (A) Immunoblots of lysates from the pancreas of wildtype mice either fasted or fasted followed by 2 h refeeding (refed). For the PERK blot, a mixture of all 6 samples treated with CIP were included as a control. For the p-PERK blot, Tg-treated MEF cell lysates with or without CIP treatment were included as a control. HSP90, a loading control. (B) Quantitation of the percent of phosphorylated IRE1 $\alpha$  in pancreas under fasting and refeeding conditions shown in A (N = 4 mice per cohort). (C) Q-PCR analyses of UPR genes in the pancreas under either fasting or refeeding. Values are mean  $\pm$  SEM. *Xbp1t*, total *Xbp1*; *Xbp1s/Xbp1t*, splicing efficiency. N = 3–4 mice. \*,  $P < 0.05$  using unpaired two-tailed Student's *t*-test. Representatives of at least two independent experiments shown. doi:10.1371/journal.pone.0011621.g004

liver diseases, neurodegeneration and type-1 diabetes [1,2], new strategies and approaches enabling a comprehensive understanding of UPR in physiological and disease settings are urgently needed to facilitate drug design targeting UPR in conformational diseases [2]. The ability to directly visualize and quantitate UPR activation is an important step towards gaining novel insights into physiological UPR and improving therapeutic strategies targeting UPR in vivo.

## Materials and Methods

### Cells and reagents

HEK293T and MEFs as described in [10] were maintained in DMEM supplemented with 10% FBS (Hyclone) and 1% penicillin/streptomycin. Tg (EMD Calbiochem) and stock CHX (Sigma) were dissolved in DMSO and ethanol, respectively. Cells were treated with Tg at indicated concentrations for the indicated times and immediately snap-frozen in liquid nitrogen. Phos-tag was purchased from NARD Institute (Japan).

### Protein lysates, Western blot and Phos-tag gels

Whole cell or nuclear extraction was performed as we previously described [10,30]. Lysate protein concentrations were measured using the Bradford assay (Biorad) and normalized to 0.5–2  $\mu$ g/ $\mu$ l using SDS sample buffer. Samples were boiled for 5 min prior to loading onto a SDS-PAGE gel. 15–30  $\mu$ g of whole cell lysates or 1–10  $\mu$ g of nuclear extracts were used in a mini

SDS-PAGE. Phos-tag gel was modified from our previous report [10] with the following running conditions: 100 V for 3 h for IRE1 $\alpha$  using 25  $\mu$ M Phos-tag and 15 mA for 15 min followed by 5 mA for 9.5 h for PERK using 3.5  $\mu$ M Phos-tag. To achieve optimal results, we always run IRE1 $\alpha$  and PERK on separate gels using the following conditions. Membranes were routinely strip-reprobed for 2–4 times. The IRE1 $\alpha$  blot in the Phos-tag gel was routinely reprobed with HSP90 (90 kDa vs. 110 kDa IRE1 $\alpha$ ) as a position control.

Importantly, for both regular and phos-tag gels, gel-running was stopped when the 75 kDa maker ran off the gel and same amounts of lysates were loaded. Therefore, the difference in separating the phosphorylated from the non-phosphorylated species between Phos-tag and regular gels was mainly attributable to the effect of Phos-tag incorporated.

### Antibodies for Western blot

GRP78 (goat, 1:1,000), XBP1 (XBP1u/s-specific, rabbit, 1:1,000), CHOP (mouse, 1:500) and HSP90 (rabbit, 1:5,000) were purchased from Santa Cruz; p-eIF2 $\alpha$ , eIF2 $\alpha$ , IRE1 $\alpha$  and (p)-PERK (rabbit) antibodies were purchased from Cell Signaling and used at 1:1,000–2,000. Primary antibodies were diluted in 5% milk/TBST or 2% BSA/TBST and incubated with PVDF membrane overnight at 4°C. Secondary antibodies were goat anti-rabbit IgG HRP, goat anti-mouse IgG HRP (Biorad) and donkey anti-goat IgG HRP (Jackson ImmunoResearch), all of which were used at 1:10,000.

## Mice and tissues

Wildtype C57BL/6 mice were purchased from the Jackson Laboratory or bred in our mouse facility. For some experiments, mice were injected with 40  $\mu\text{g}$  CHX per g body weight (dissolved in 100  $\mu\text{l}$  PBS) for 2 h. Epididymal white adipose tissues (WAT) and pancreas were harvested. Following cervical dislocation, tissues were harvested immediately, snap-frozen in liquid nitrogen and stored at  $-80^{\circ}\text{C}$ . All animal procedures have been described previously [31,32] and were approved by the Cornell IACUC (#2007-0051).

## Plasmids and transfection

NHK, wildtype and dominant negative E305Q/E578Q p97 (p97-QQ) plasmids were gifts from Qiaoming Long and Fenghua Hu (Cornell University), respectively. HEK293T were transfected with plasmids using polyethylenimine (PEI, Sigma) as we recently described [30]. Cells were snap-frozen in liquid nitrogen 24 h post-transfection followed by Western blot.

## Phosphatase treatment

100  $\mu\text{g}$  cell lysates or tissue lysates were incubated with 2.5  $\mu\text{l}$  calf intestinal phosphatase (CIP) or 0.5  $\mu\text{l}$  lambda phosphatase ( $\lambda\text{PPase}$ , New England BioLabs- NEB) in 1 $\times$  NEB buffer 3 (100 mM NaCl, 50 mM Tris-HCl, 10 mM  $\text{MgCl}_2$ , 1 mM DTT) or 1 $\times$  PMP buffer (50 mM HEPES, 100 mM NaCl, 2 mM DTT, 0.01% Brij35, NEB) with 1 mM  $\text{MnCl}_2$  at 37 or  $30^{\circ}\text{C}$  for 45 or 30 min, respectively. Reaction was stopped by adding 5 $\times$  SDS sample buffer and incubated at  $90^{\circ}\text{C}$  for 5 min.

## RNA extraction and Q-PCR

Total mRNA extractions were carried out using a combination of Trizol and RNeasy kit (Qiagen) for pancreas. RNAs were reverse transcribed using Superscript III kit (Invitrogen). For Q-PCR, cDNA were analyzed using the SYBR Green PCR system on the Roche 480 LightCycler (Roche). Reactions using samples with no RT and water were included as negative controls to ensure the specificity of the Q-PCR reaction. All Q-PCR data were normalized to ribosomal *l32* gene in the corresponding sample. Primer sequences are listed in Supplementary material Table S1.

## Image quantification

Quantification was performed using the NIH ImageJ software where band densities were calculated and subtracted from the background. Data are represented as mean  $\pm$  SEM from several independent samples or experiments.

## Statistical analysis

Results are expressed as mean  $\pm$  SEM. Comparisons between groups were made by unpaired two-tailed Student *t*-test.  $P < 0.05$

## References

- Ron D, Walter P (2007) Signal integration in the endoplasmic reticulum unfolded protein response. *Nat Rev Mol Cell Biol* 8: 519–529.
- Kim I, Xu W, Reed JC (2008) Cell death and endoplasmic reticulum stress: disease relevance and therapeutic opportunities. *Nat Rev Drug Discov* 7: 1013–1030.
- Basseri S, Lhotak S, Sharma AM, Austin RC (2009) The chemical chaperone 4-phenylbutyrate inhibits adipogenesis by modulating the unfolded protein response. *J Lipid Res* 50: 2486–2501.
- Back SH, Scheuner D, Han J, Song B, Ribick M, et al. (2009) Translation attenuation through eIF2alpha phosphorylation prevents oxidative stress and maintains the differentiated state in beta cells. *Cell Metab* 10: 13–26.
- Malhotra JD, Miao H, Zhang K, Wolfson A, Pennathur S, et al. (2008) Antioxidants reduce endoplasmic reticulum stress and improve protein secretion. *Proc Natl Acad Sci U S A* 105: 18525–18530.
- Woo CW, Cui D, Arellano J, Dorweiler B, Harding H, et al. (2009) Adaptive suppression of the ATF4-CHOP branch of the unfolded protein response by toll-like receptor signalling. *Nat Cell Biol* 11: 1473–1480.
- Miyata Y, Fukuhara A, Matsuda M, Komuro R, Shimomura I (2008) Insulin induces chaperone and CHOP gene expressions in adipocytes. *Biochem Biophys Res Commun* 365: 826–832.
- Brewer JW, Cleveland JL, Hendershot LM (1997) A pathway distinct from the mammalian unfolded protein response regulates expression of endoplasmic reticulum chaperones in non-stressed cells. *EMBO J* 16: 7207–7216.
- Kinoshita E, Kinoshita-Kikuta E, Takiyama K, Koike T (2006) Phosphate-binding tag, a new tool to visualize phosphorylated proteins. *Mol Cell Proteomics* 5: 749–757.
- Sha H, He Y, Chen H, Wang C, Zenno A, et al. (2009) The IRE1alpha-XBP1 pathway of the unfolded protein response is required for adipogenesis. *Cell Metab* 9: 556–564.
- Kozutsumi Y, Segal M, Normington K, Gething MJ, Sambrook J (1988) The presence of malfolded proteins in the endoplasmic reticulum signals the induction of glucose-regulated proteins. *Nature* 332: 462–464.

was considered as statistically significant. All experiments were repeated at least twice.

## Supporting Information

**Figure S1** Immunoblots of p-Thr980 PERK, IRE1 $\alpha$  (left) and total PERK (right) in different MEFs treated with or without Tg. (left) IRE1 $\alpha$ -/- and PERK-/- MEFs were used; (right) wildtype (+/+), PERK-/- (-/-) and PERK-/- MEFs rescued with wildtype PERK (-/- + wt).

Found at: doi:10.1371/journal.pone.0011621.s001 (0.16 MB JPG)

**Figure S2** (A) Immunoblots of IRE1 $\alpha$  (top) and PERK (bottom) in various tissues of wildtype mice under feeding conditions, an independent experiment from the one shown in Figure 3A. WAT, white adipose tissues; Panc, pancreas; Muscle, gastrocnemius. (B) Original Phos-tag whole-gel images for the data shown in Fig. 3B. Note the specificity of the antibody and the complete reverse of phosphorylation upon phosphatase treatment. (C) Immunoblots of IRE1 $\alpha$  and PERK in muscle lysates treated with  $\lambda\text{PPase}$ . The multiple bands of IRE1 $\alpha$  in the muscle are not due to hyperphosphorylation and PERK protein levels are beyond detection limit. (D) Immunoblots of IRE1 $\alpha$  and PERK in lysates extracted from different regions of the pancreas of 13-week-old wildtype mice under the 20 h-fasting (F) and 2 h-refeeding (R) conditions. The position of the pancreas is relative to the duodenum (proximal, middle or distal) - see the diagram on top. HSP90, a loading control. Phos-tag gels are indicated with a bar at the left-hand side. Found at: doi:10.1371/journal.pone.0011621.s002 (0.35 MB JPG)

**Table S1** Primers used in this study.

Found at: doi:10.1371/journal.pone.0011621.s003 (0.04 MB PDF)

## Acknowledgments

We thank Drs. Qiaoming Long and Fenghua Hu for plasmids; Sylvia Allen for excellent care and supply of the mice; Drs. Scott Emr, Fenghua Hu, Martha Stipanuk and Marcus Smolka (Cornell University) for critical reading of the manuscript; and other members of the Qj laboratory for helpful discussions and technical assistance. A patent has been filed regarding methods to quantitate ER stress.

## Author Contributions

Conceived and designed the experiments: LY LQ. Performed the experiments: LY ZX SS. Analyzed the data: LY ZX SS LQ. Contributed reagents/materials/analysis tools: HC. Wrote the paper: YH LQ.

12. Cox JS, Shamu CE, Walter P (1993) Transcriptional induction of genes encoding endoplasmic reticulum resident proteins requires a transmembrane protein kinase. *Cell* 73: 1197–1206.
13. Mori K, Ma W, Gething MJ, Sambrook J (1993) A transmembrane protein with a cdc2+/CDC28-related kinase activity is required for signaling from the ER to the nucleus. *Cell* 74: 743–756.
14. Sifers RN, Brashears-Macatee S, Kidd VJ, Muensch H, Woo SL (1988) A frameshift mutation results in a truncated alpha 1-antitrypsin that is retained within the rough endoplasmic reticulum. *J Biol Chem* 263: 7330–7335.
15. Ye Y, Meyer HH, Rapoport TA (2001) The AAA ATPase Cdc48/p97 and its partners transport proteins from the ER into the cytosol. *Nature* 414: 652–656.
16. Francisco AB, Singh R, Li S, Vani AK, Yang L, et al. (2010) Deficiency of suppressor enhancer lin12 1 like (SEL1L) in mice leads to systemic endoplasmic reticulum stress and embryonic lethality. *J Biol Chem* 285: 13694–13703.
17. Iwawaki T, Akai R, Kohno K, Miura M (2004) A transgenic mouse model for monitoring endoplasmic reticulum stress. *Nat Med* 10: 98–102.
18. Travers KJ, Patil CK, Wodicka L, Lockhart DJ, Weissman JS, et al. (2000) Functional and genomic analyses reveal an essential coordination between the unfolded protein response and ER-associated degradation. *Cell* 101: 249–258.
19. Wu J, Kaufman RJ (2006) From acute ER stress to physiological roles of the Unfolded Protein Response. *Cell Death Differ* 13: 374–384.
20. Reimold AM, Etkin A, Clauss I, Perkins A, Friend DS, et al. (2000) An essential role in liver development for transcription factor XBP-1. *Genes Dev* 14: 152–157.
21. Zhang K, Wong HN, Song B, Miller CN, Scheuner D, et al. (2005) The unfolded protein response sensor IRE1alpha is required at 2 distinct steps in B cell lymphopoiesis. *J Clin Invest* 115: 268–281.
22. Masaki T, Yoshida M, Noguchi S (1999) Targeted disruption of CRE-binding factor TREB5 gene leads to cellular necrosis in cardiac myocytes at the embryonic stage. *Biochem Biophys Res Commun* 261: 350–356.
23. Morisset JA, Webster PD (1972) Effects of fasting and feeding on protein synthesis by the rat pancreas. *J Clin Invest* 51: 1–8.
24. Lee AH, Chu GC, Iwakoshi NN, Glimcher LH (2005) XBP-1 is required for biogenesis of cellular secretory machinery of exocrine glands. *EMBO J* 24: 4368–4380.
25. Harding HP, Zeng H, Zhang Y, Jungries R, Chung P, et al. (2001) Diabetes mellitus and exocrine pancreatic dysfunction in *perk*<sup>-/-</sup> mice reveals a role for translational control in secretory cell survival. *Mol Cell* 7: 1153–1163.
26. Zhang P, McGrath B, Li S, Frank A, Zambito F, et al. (2002) The PERK eukaryotic initiation factor 2 alpha kinase is required for the development of the skeletal system, postnatal growth, and the function and viability of the pancreas. *Mol Cell Biol* 22: 3864–3874.
27. Slot JW, Strous GJ, Geuze JJ (1979) Effect of fasting and feeding on synthesis and intracellular transport of proteins in the frog exocrine pancreas. *J Cell Biol* 80: 708–714.
28. Slot JW, Geuze JJ (1979) A morphometrical study of the exocrine pancreatic cell in fasted and fed frogs. *J Cell Biol* 80: 692–707.
29. Powers ET, Morimoto RI, Dillin A, Kelly JW, Balch WE (2009) Biological and chemical approaches to diseases of proteostasis deficiency. *Annu Rev Biochem* 78: 959–991.
30. Chen H, Qi L (2010) SUMO modification regulates transcriptional activity of XBP1. *Biochem J* 429: 95–102.
31. Qi L, Heredia JE, Altarejos JY, Sreaton R, Goebel N, et al. (2006) TRB3 links the E3 ubiquitin ligase COP1 to lipid metabolism. *Science* 312: 1763–1766.
32. Qi L, Saberi M, Zmuda E, Wang Y, Altarejos J, et al. (2009) Adipocyte CREB promotes insulin resistance in obesity. *Cell Metab* 9: 277–286.
